# Supplementary figures and images for: Synthesis and crystal engineering of new halogenated tetrathiafulvalene (TTF) derivatives and their charge transfer complexes and radical ion salts
Source: Royal Society of Chemistry journal article supplement (doi:10.1039/b101866n), 2001-01-01

Crystal structure of the complex **1∙18**:


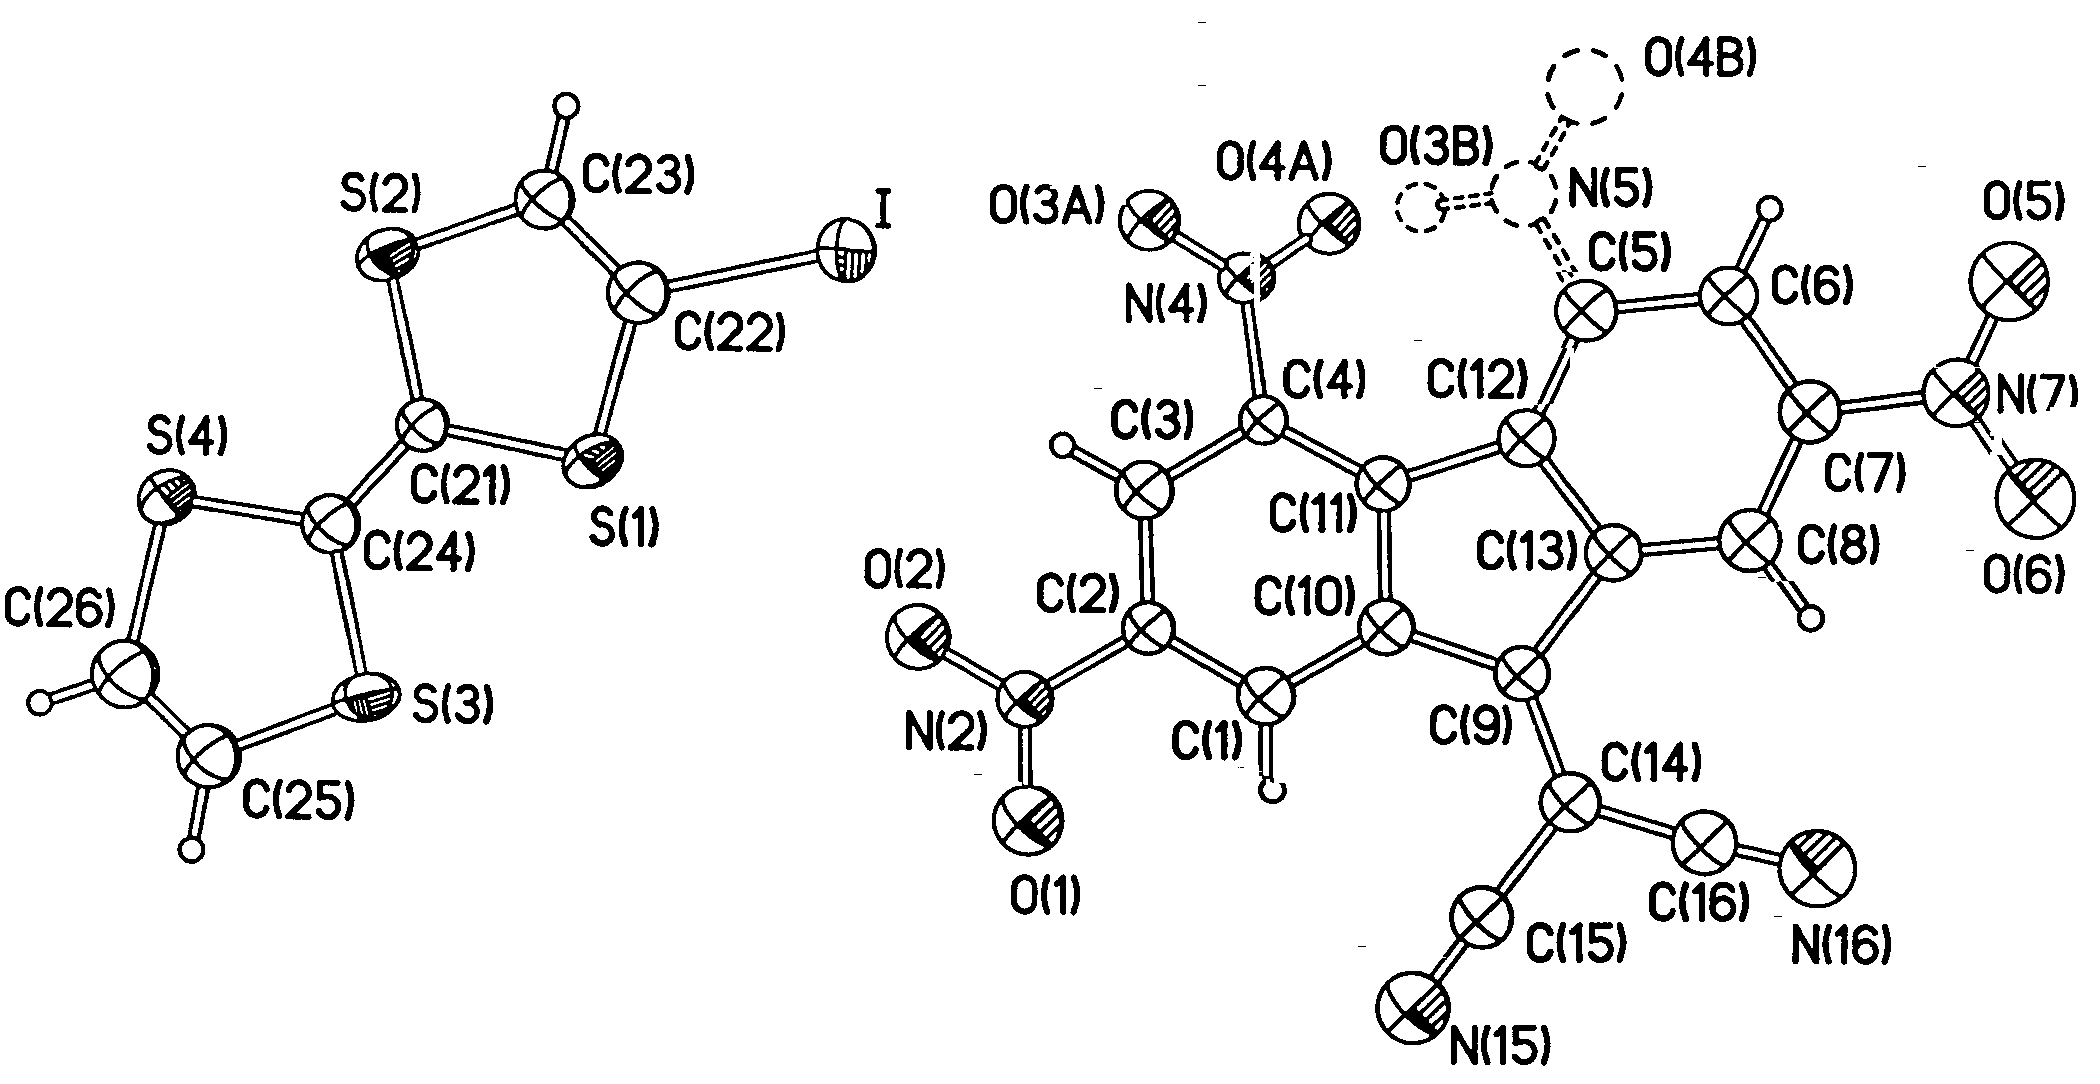

Supplement: b101866nf.doc [file b101866nf.doc]
